# Supplementary material for: Genetic Diversity and Structure of Coix lacryma-jobi L. from Its World Secondary Diversity Center, Southwest China
Source: Int J Genomics. 2019 Jan 21;2019:9815697. doi: 10.1155/2019/9815697 (PMC6360581; doi:10.1155/2019/9815697)
Supplement: Supplementary Materials — Supplementary Table S1: morphological characteristics of 139 Coix lacryma-jobi L. genotypes. [file 9815697.f1.xlsx]

## Sheet: Sheet1
Breeder's references	Plant height (cm)	Tiller number	Nod on main stem	Branch number	Leaf length (cm)	Leaf width (cm)	Hundred-grain weight (g)
GX-1	212.067	12.3333	8.2	6.1	46.2	3.1	8.88
GX-3	118.033	8.66667	12.5	7.4	50.5	3.6	8.37
GX-4	206.733	11.6667	8.8	6.7	43.3	2.8	8.39
GX-5	199.767	11.6667	11.3	7.2	49.7	2.9	5.97
GX-6	228.867	10	8.9	7.8	36.5	2.2	6.8
GX-7	204.333	9	9.1	7.2	49.8	3.1	10.13
GZ-8b	188.7	12.3333	9.6	5.5	48.9	3.1	5.81
GZ-9	206.7	7.33333	10.7	6.6	43.4	2.9	4.74
GZ-9b	NA	NA	NA	NA	NA	NA	NA
GZ-10	216.367	8	8.5	5.4	52.2	2.4	7.45
GZ-11wil	154.333	10.6667	5.9	5.8	32.5	2.2	11.19
GZ-14	217.267	11	11.2	9.1	46.2	3.2	7.81
GZ-15	187.967	6.66667	12.6	5.5	45.5	1.5	5.66
GZ-16	807.867	7.66667	12.4	7.3	64.4	4.7	9.85
GZ-18	172.2	9.66667	7.5	6.3	40.5	2.2	11.06
GZ-19	207.033	6.33333	5.8	5.1	32.9	2.2	13.08
YN-20	194.5	12	9.3	6.7	44.4	2.6	9.48
YN-24	167.5	8	10.9	6.6	46.8	3.1	7.82
YN-26whi	176.367	8.66667	11	5.2	43.5	2.6	7.15
YN-27	156.9	10.6667	10.2	4.8	56.1	0.6	8.8
YN-28	176.6	9.66667	9.6	3.2	52.2	2.2	8.04
YN-29B	169.8	8.66667	9.4	6.7	43.6	2.9	6.6
GZ-30	164.367	7.66667	13.6	6.4	69.4	3.6	7.98
SC-31	176.167	7.33333	11.2	5.3	41.2	2.9	15.62
SC-32	195.567	11	13.8	7.1	50.8	2.6	10.21
SC-33	194.5	11.3333	12.3	5	40.6	3.2	16.87
SC-34whi	NA	NA	NA	NA	NA	NA	NA
SC-34whicul	187.733	9.33333	14.9	7.1	60.8	3.3	6.79
SC-34wil	NA	NA	NA	NA	NA	NA	NA
SC-35	197.133	12.6667	16.5	12.7	53.7	3.4	7.46
SC-36wil	160.5	10	9.7	6.8	53.4	3.1	7.79
SC-38	173.033	8.33333	10.1	6.5	51.8	2.8	12.41
SC-39	181.8	10.3333	9.01	5.6	43.6	3.8	13.98
SC-41	183.8	11.3333	8.8	5.2	46.7	2.9	NA
YN-42	174.967	10	10.5	7.8	52.1	3.2	8.91
GZ-43B	164.667	7	8.4	7.1	48.3	2.7	12.33
GZ-44	183.7	11.6667	11.2	7.7	46.4	3	12.59
GZ-45	196.2	10	9.6	5.3	41.5	2.3	6.87
GZ-46	210.433	11.6667	8.7	5.5	48.9	2.7	10.29
GZ-47	835.567	10	8.5	5.1	52.5	3.3	5.37
GZ-48	177.433	10	13	10.2	56.7	3.6	8.12
GZ-62whi	178.533	8.33333	8.3	4.8	38.9	3.2	9.42
GX-65B	250.167	8.66667	10.4	6.5	47.3	2.7	19.46
GZ-66	222.033	10	10.2	6.6	45.3	3.2	4.66
GZ-67	198.233	9	7.5	6.2	44.4	2.8	8.88
YN-68	210.767	6.33333	8.8	6.8	38.5	2.8	6.91
YN-69	219.767	11	6.7	5	45.1	3.2	NA
YN-69whi	NA	NA	NA	NA	NA	NA	NA
YN-70	169.133	8.33333	10.6	7	43.4	3.1	9.84
GZ-71	183.733	9	11.1	6.1	53.5	3.1	7.36
GZ-73whi	178.933	9.66667	12.8	7.4	46.7	3.2	7.23
GZ-74	180.033	8.33333	11.2	7	45.2	2.8	8.03
GZ-75	174.033	9.33333	10.4	6.1	49.5	3.1	8.26
GZ-76	176.367	12	9.5	5.3	42.2	2.9	4.91
GZ-78	151.6	10.3333	11.9	7.1	50.4	2.7	11.78
GZ-79	170.9	8.66667	9.2	6.7	46.3	3.1	14.02
GZ-80	165.533	7	8.1	6.2	51.9	3.3	6.85
GZ-82	NA	NA	NA	NA	NA	NA	NA
GZ-82blacul	185.833	8.33333	9.7	7.4	49.7	2.9	NA
GZ-83	132.367	12.6667	13.5	8.6	42.7	2.6	8.29
GZ-84	165.367	8	11.3	8.5	45.8	3.1	7.15
GZ-85	168.6	12.3333	10.8	7.2	51.2	2.8	9.68
GZ-101	158.7	8.66667	8.2	5.9	43.5	2.7	8.09
GZ-103	162.933	9	9.6	6.5	50.1	2.8	NA
GZ-105	171.2	10.6667	10.2	7.2	42.4	2.9	NA
GZ-107	173.9	9.33333	14.5	9.5	45.3	3.2	8.09
GZ-108	162.233	8.66667	9.8	6.3	50.2	2.7	NA
GZ-109	179.6	13.3333	13.3	6.3	46.7	2.8	7.95
GZ-111	244.3	9	10.1	7.8	51.6	3.2	6.23
GZ-112	198.833	6.66667	9.6	7.9	41.5	2.3	10.64
GZ-120wil	162.467	10	13.4	8.6	51.7	3.5	11.96
GZ-121	157	9	10.9	7.7	47.5	2.7	7.78
GZ-123	146.1	10.3333	13.6	7.3	47.8	3.4	12.67
GZ-124	151.8	9	10.2	7.6	50.5	2.9	8.62
GZ-128	143.6	8.66667	10.1	7.5	46.9	2.8	5.88
GZ-130	148.7	7	14.2	8.3	51.4	3.2	10.69
GZ-131	158.967	8	10.1	6.8	49.7	2.9	8.39
GZ-132	142.133	10.3333	11.2	7.6	50.6	3.1	10.38
GZ-134	172.2	15.3333	12.6	8.4	45.3	3.1	9.57
GZ-135	198.067	7	14.7	8.2	52.3	3.3	7.07
GZ-136	162.3	6.33333	11.3	7.1	50.8	3.3	9.33
GZ-141	155.1	8.33333	10.5	6.2	44.6	2.6	7.27
GZ-142	145.233	10.3333	13.8	8.1	53.4	3.2	8.19
GZ-145	169.533	10.3333	11.9	8.4	54.1	3.5	13.46
GZ-147	167.9	9	14.7	7.6	46.5	3.7	7.69
GZ-148	157.1	7	10.5	7.3	51.1	3.1	7.63
GZ-149	138.967	11.3333	13.9	7.4	49.2	3.2	10.94
YN-150whi	173.3	9.33333	9.3	6.7	44.1	2.9	NA
GX-151whi	150.133	9.33333	10.8	6.1	45.7	3.4	8.49
YN-152	174.8	7	9.2	7.2	44.5	3.6	6.89
YN-154bla	NA	NA	NA	NA	NA	NA	NA
YN-154whi	146.467	11.3333	8.3	7.2	43.6	3.1	14.54
YN-155	198.233	9	9.5	6.6	49.2	3.2	7
GX-156	185.933	8	13.4	7.4	45.1	3.2	12.45
YN-157	171.967	9.33333	9.6	6.3	40.4	2.5	8.2
YN-159	141.367	8.33333	9.4	5.3	51.7	3.2	11.25
YN-160	167.3	10.3333	11.8	7.4	49.5	3.1	17.39
YN-164	190.433	11	13.3	7.5	50.5	3.3	10.19
YN-165	225.1	7.33333	10.4	6.8	51.4	3.2	8.75
YN-166	172.533	9.66667	12.7	7.4	42.5	3.4	7.46
GZ-171	160.5	8	11.6	7.7	50.6	3.1	9.05
SC-201	157.167	9.66667	.9.9	6.3	45.2	2.9	7.89
SC-202	162.967	9.33333	11.3	7.1	46.5	3.3	NA
SC-203	237.967	9.33333	12.8	8	47.1	3.1	NA
SC-205	185.033	11.6667	13.4	9.1	52.5	3.2	7.69
SC-206	176.033	11	10.3	7.5	50.4	3.2	NA
GZ-207	207.733	12.3333	10.5	6.6	48.2	2.9	NA
GZ-209	NA	NA	NA	NA	NA	NA	NA
GZ-209wil	156.1	11	8.6	4.3	53.5	3.4	NA
GZ-210	128.633	10	11.1	7.7	53.7	3.2	NA
GZ-212	184.5	10.3333	8.5	6.4	42.6	2.7	5.62
GZ-213	204.933	6.33333	12.4	7.8	45.3	3.1	8.11
GZ-214	228.4	10.6667	9.7	6.4	41.3	2.4	7.2
GZ-215	156.833	9.66667	11.6	7.9	46.7	3.3	6.88
YN-217	160.533	7.66667	13.5	8.3	49.4	3.1	9.46
YN-218	169.7	12.6667	11.7	7.4	41.4	2.6	11.95
YN-219	164.533	8.33333	9.1	6.7	45.9	2.7	6.69
GZ-221	151.733	9.33333	9.2	7.8	42.6	3.4	9.34
GZ-223	148.3	6.33333	9.5	6.5	45.5	2.7	10.04
GZ-227	160.633	10	8.1	6.2	50.5	3.1	7.78
GZ-227whi	NA	NA	NA	NA	NA	NA	NA
GZ-228	146.833	9.33333	11.4	7.7	48.6	3.1	7.7
GZ-229	149.767	12.3333	9.5	6.1	50.2	3.2	8.44
GZ-232	145.567	7	13.9	8.3	47.2	3.1	10.02
GZ-233	148.3	6.33333	9.5	6.5	45.5	2.7	9.9
GZ-234	158.167	12.3333	11.6	7.1	48.7	3.1	6.85
GZ-234bla	NA	NA	NA	NA	NA	NA	NA
GZ-235	155.067	6.66667	13.5	7.7	51.2	3.1	7.92
GZ-236	174.9	9.66667	9.2	6.2	50.4	3.1	8.13
GZ-240	190.067	11	8.7	6.8	40.7	2.4	5.66
GZ-241	174.067	9.33333	12.3	8.4	46.4	2.9	9.11
GZ-245	107.433	8	10.4	7.2	49.5	2.9	7.46
GZ-248	146.067	9.66667	12.5	7.6	50.5	3.1	7.96
GZ-249	158.733	7.33333	8.3	5.4	41.4	2.4	7.94
GZ-250	162.333	6.66667	11.4	6.3	49.2	3.4	7.07
GZ-251	162.9	6	9.5	6.1	45.2	2.9	8.6
GZ-266	NA	NA	NA	NA	NA	NA	NA
GZ-Anshun 2	133.367	7.33333	11.7	7.4	49.6	3.1	NA
GZ-Haizi	167.433	10.6667	9.7	5.5	47.1	2.8	10.68
